# Supplementary material
Source: PubMed Central journal article supplement (PMC10724861)

**A**

| Assay                              | Sample type | Infants |             |         |      |      |          | Adults/Mothers |             |         |      |      |       |
|------------------------------------|-------------|---------|-------------|---------|------|------|----------|----------------|-------------|---------|------|------|-------|
|                                    |             | pre     | acute       |         | conv | ctrl | maternal | pre            | acute       |         | conv | ctrl | total |
|                                    |             |         | non-omicron | omicron |      |      |          |                | non-omicron | omicron |      |      |       |
| S-Specific B cells                 | pbmc        | 12      | 12          | 3       | 21   | 10   |          | 17             |             |         | 2    |      | 77    |
| Antigen-specific T cells           | pbmc        | 12      | 12          | 3       | 21   | 10   |          | 16             |             |         | 2    |      | 76    |
| CytoF                              | pbmc        | 14      | 19          | 14      | 14   | 14   |          |                |             |         |      |      | 75    |
| scMultiomics                       | pbmc        | 9       | 10          | 8       | 9    | 7    |          |                |             |         |      |      | 43    |
| MSD antibody binding titer         | plasma      | 27      | 19          | 18      | 30   | 5    |          | 15             |             |         | 10   | 4    | 128   |
| Olink inflammation panel           | plasma      | 27      | 19          | 18      | 30   | 27   |          | 15             |             |         |      | 10   | 146   |
| MSD IFNa2                          | plasma      | 27      | 19          | 22      | 30   | 27   |          | 15             |             |         |      | 10   | 150   |
| Neutralizing titers                | serum       | 27      | 19          | 18      | 30   |      |          | 16             |             |         |      |      | 110   |
| Neutralizing titers -Omicron subt. | serum       | 27      | 19          | 18      | 30   |      |          |                |             |         |      |      | 94    |
| bulkRNA-seq                        | tempus      | 27      | 19          | 18      |      | 26   |          |                |             |         |      |      | 90    |
| Olink inflammation panel - mothers | plasma      |         |             |         |      |      |          | 3              | 21          | 20      |      | 3    | 47    |
| MSD IFNa2 - mothers                | plasma      |         |             |         |      |      |          | 3              | 21          | 20      |      | 3    | 47    |
| Auto-antibodies - ELISA            | plasma      | 27      | 19          | 18      | 30   | 27   | 30       | 15             |             |         |      | 10   | 176   |
| Olink inflammation panel - nose    | nasal swabs | 2       | 7           | 45      | 17   | 20   |          | 9              | 40          |         |      | 19   | 159   |
| MSD IFNa2 - nose                   | nasal swabs | 2       | 7           | 45      | 17   | 20   |          | 9              | 40          |         |      | 19   | 159   |
| Bradford protein assay - nose      | nasal swabs | 2       | 7           | 45      | 17   | 20   |          | 9              | 40          |         |      | 19   | 159   |

**B** Binding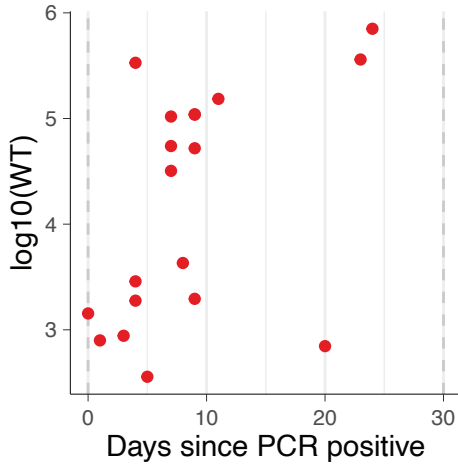**C** Neut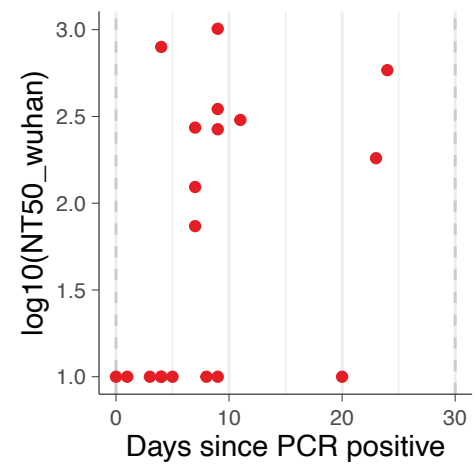**E** Neut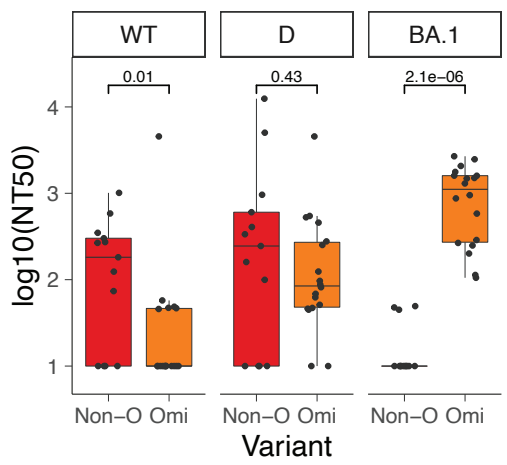**D** Binding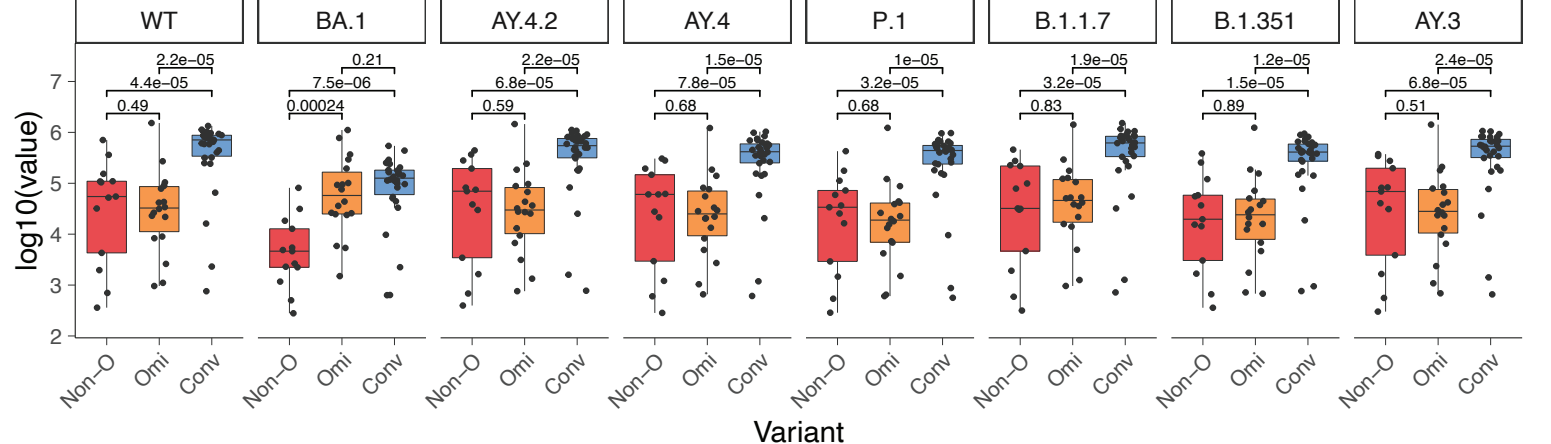**F** Auto-antibodies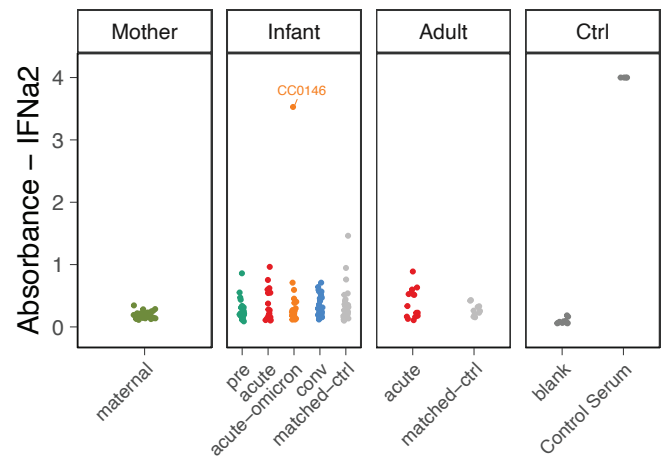**G**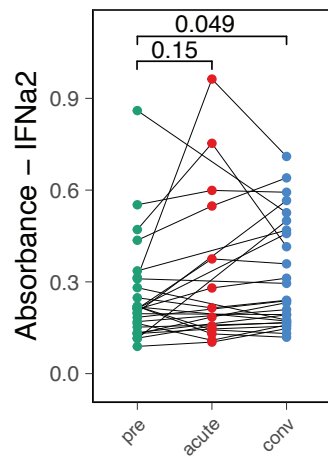**H**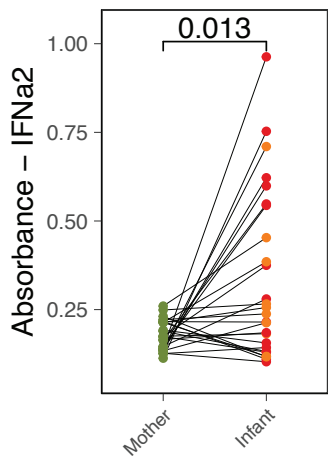

Supplement: NIHMS1946837-supplement-FigureS1.pdf [file NIHMS1946837-supplement-FigureS1.pdf]
