# Supplementary material
Source: PubMed Central journal article supplement (PMC10724861)
Supplement: NIHMS1946837-supplement-DataS1_230816.pdf [file NIHMS1946837-supplement-DataS1_230816.pdf]

**DataS1: Demographic and disease information on human participants and details on cytometry experiments, related to STAR Methods.**

**Multi-omics analysis of mucosal and systemic immunity to SARS-CoV-2 after birth**

Florian Wimmers, Allison R. Burrell, Yupeng Feng, Hong Zheng, Prabhu S. Arunachalam, Mengyun Hu, Sara Spranger, Lindsay Nyhoff, Devyani Joshi, Meera Trisal, Mayanka Awasthi, Lorenza Bellusci, Usama Ashraf, Sangeeta Kowli, Katherine C. Konvinse, Emily Yang, Michael Blanco, Kathryn Pellegrini, Gregory Tharp, Thomas Hagan, R. Sharon Chinthrajah, Tran T. Nguyen, Alba Grifoni, Alessandro Sette, Kari C. Nadeau, David B. Haslam, Steven E. Bosinger, Jens Wrammert, Holden T. Maecker, Paul J. Utz, Taia T. Wang, Surender Khurana, Purvesh Khatri, Mary A. Staat, Bali Pulendran

**Infant Demographics Table – Blood samples**

|                                                       | Controls (n = 27)      | Cases (n = 54)<br>[including 27 longitudinal cases with pre-infection sample] |
|-------------------------------------------------------|------------------------|-------------------------------------------------------------------------------|
| Female                                                | 11                     | 24                                                                            |
| Male                                                  | 16                     | 30                                                                            |
| Hispanic                                              | 3                      | 3                                                                             |
| Not Hispanic                                          | 24                     | 51                                                                            |
| White                                                 | 19                     | 42                                                                            |
| Black/African American                                | 4                      | 8                                                                             |
| White, Black/African American                         | 4                      | 2                                                                             |
| White, Other                                          | 0                      | 1                                                                             |
| American Indian/Native Alaskan                        | 0                      | 1                                                                             |
| Pre-Omicron                                           | NA                     | 32                                                                            |
| Omicron                                               | NA                     | 22                                                                            |
| Age in Months (Mean)                                  | 14 (Age at specimen)   | 12 (Age at first positive swab)                                               |
| Age in Months (Median)                                | 12 (Age at specimen)   | 9 (Age at first positive swab)                                                |
| Age in Months (Range)                                 | 5-39 (Age at specimen) | 1-47 (Age at first positive swab)                                             |
| Symptomatic Around First Positive Swab (Any Symptom)  | NA                     | 50                                                                            |
| Asymptomatic Around First Positive Swab (Any Symptom) | NA                     | 4                                                                             |
| If Symptomatic – Was Cough/Fever Present?             | NA                     | 41 of 50                                                                      |

**Infant Demographics Table – Nasal samples** (A subset of blood sample cohort - 58 of 81)

|                                                       | Controls (n = 20 )        | Cases (n = 38 )<br>[including 2 longitudinal cases<br>with pre-infection sample] |
|-------------------------------------------------------|---------------------------|----------------------------------------------------------------------------------|
| Female                                                | 10                        | 17                                                                               |
| Male                                                  | 10                        | 21                                                                               |
|                                                       |                           |                                                                                  |
| Hispanic                                              | 3                         | 2                                                                                |
| Not Hispanic                                          | 17                        | 36                                                                               |
|                                                       |                           |                                                                                  |
| White                                                 | 15                        | 28                                                                               |
| Black/African American                                | 3                         | 6                                                                                |
| White, Black/African American                         | 2                         | 2                                                                                |
| White, Other                                          | 0                         | 1                                                                                |
| American Indian/Native Alaskan                        | 0                         | 1                                                                                |
|                                                       |                           |                                                                                  |
| Pre-Omicron                                           | NA                        | 20                                                                               |
| Omicron                                               | NA                        | 18                                                                               |
|                                                       |                           |                                                                                  |
| Age in Months (Mean)                                  | 13 (Age at IFNa swab)     | 12 (Age at first positive swab)                                                  |
| Age in Months (Median)                                | 10 (Age at IFNa swab)     | 9 (Age at first positive swab)                                                   |
| Age in Months (Range)                                 | 4 – 39 (Age at IFNa swab) | 1 – 47 (Age at first positive swab)                                              |
|                                                       |                           |                                                                                  |
| Symptomatic Around First Positive Swab (Any Symptom)  | NA                        | 35                                                                               |
| Asymptomatic Around First Positive Swab (Any Symptom) | NA                        | 3                                                                                |
| If Symptomatic – Was Cough/Fever Present?             | NA                        | 29 of 35                                                                         |

**Adult Demographics Table**

|                           | Controls (n = 10)                    | Cases (n = 48)            |
|---------------------------|--------------------------------------|---------------------------|
| Female                    | 5                                    | 25                        |
| Male                      | 5                                    | 23                        |
|                           |                                      |                           |
| Hispanic                  | 1                                    | 1                         |
| Not Hispanic              | 7                                    | 35                        |
| No data available         | 2                                    | 12                        |
|                           |                                      |                           |
| White                     | 8                                    | 14                        |
| Black/African American    | 0                                    | 25                        |
| Other                     | 2                                    | 0                         |
| No data available         | 0                                    | 9                         |
|                           |                                      |                           |
| Pre-Omicron               | NA                                   | 48                        |
| Omicron                   | NA                                   | 0                         |
|                           |                                      |                           |
| Age in Years (Mean)       | 52 (Age at first positive swab)      | 57 (Age at specimen)      |
| Age in Years (Median)     | 53 (Age at first positive swab)      | 59 (Age at specimen)      |
| Age in Years (Range)      | 25 – 90 (Age at first positive swab) | 24 – 85 (Age at specimen) |
|                           |                                      |                           |
| Mild and moderate disease | NA                                   | 19                        |
| Severe disease            | NA                                   | 20                        |
| ICU                       | NA                                   | 9                         |

**Mothers Demographics Table – Blood samples**

|                                                                       | Controls (n = 3)        | Cases (n = 41)<br>[including 3 longitudinal cases<br>with pre-infection] |
|-----------------------------------------------------------------------|-------------------------|--------------------------------------------------------------------------|
| Female                                                                | 3                       | 41                                                                       |
| Male                                                                  | 0                       | 0                                                                        |
|                                                                       |                         |                                                                          |
| Hispanic                                                              | 0                       | 1                                                                        |
| Not Hispanic                                                          | 3                       | 40                                                                       |
|                                                                       |                         |                                                                          |
| White                                                                 | 3                       | 31                                                                       |
| Black/African American                                                | 0                       | 8                                                                        |
| White, Black/African American                                         | 0                       | 1                                                                        |
| Asian                                                                 | 0                       | 1                                                                        |
|                                                                       |                         |                                                                          |
| Pre-Omicron                                                           | NA                      | 21                                                                       |
| Omicron                                                               | NA                      | 20                                                                       |
|                                                                       |                         |                                                                          |
| Symptomatic Around First<br>Positive Swab (Any Symptom)               | NA                      | 37                                                                       |
| Asymptomatic Around First<br>Positive Swab (Any Symptom)              | NA                      | 4                                                                        |
| If Symptomatic – Was<br>Cough/Fever Present?                          | NA                      | 26                                                                       |
| Sought medical attention at an<br>Emergency Department or<br>Hospital | NA                      | 1                                                                        |
|                                                                       |                         |                                                                          |
| Age in Years (Mean)                                                   | 38 (Age at plasma)      | 34 (Age at first positive swab)                                          |
| Age in Years (Median)                                                 | 38 (Age at plasma)      | 33 (Age at first positive swab)                                          |
| Age in Years (Range)                                                  | 37 – 39 (Age at plasma) | 22 – 42 (Age at first positive<br>swab)                                  |

**Mothers Demographics Table – Nasal samples** (All cases and one control are a subset of the maternal plasma sample cohort – 20 of 44)

|                                                                 | Controls (n = 19)          | Cases (n = 19)                       |
|-----------------------------------------------------------------|----------------------------|--------------------------------------|
| Female                                                          | 19                         | 19                                   |
| Male                                                            | 0                          | 0                                    |
|                                                                 |                            |                                      |
| Hispanic                                                        | 1                          | 1                                    |
| Not Hispanic                                                    | 18                         | 18                                   |
|                                                                 |                            |                                      |
| White                                                           | 13                         | 14                                   |
| Black/African American                                          | 4                          | 4                                    |
| Asian                                                           | 1                          | 1                                    |
| None                                                            | 1                          | 0                                    |
|                                                                 |                            |                                      |
| Pre-Omicron                                                     | NA                         | 4                                    |
| Omicron                                                         | NA                         | 15                                   |
|                                                                 |                            |                                      |
| Symptomatic Around First Positive Swab (Any Symptom)            | NA                         | 15                                   |
| Asymptomatic Around First Positive Swab (Any Symptom)           | NA                         | 4                                    |
| If Symptomatic – Was Cough/Fever Present?                       | NA                         | 12 of 15                             |
| Sought medical attention at an Emergency Department or Hospital | NA                         | 0                                    |
|                                                                 |                            |                                      |
| Age in Years (Mean)                                             | 31 (Age at IFNa swab)      | 34 (Age at first positive swab)      |
| Age in Years (Median)                                           | 32 (Age at IFNa swab)      | 33 (Age at first positive swab)      |
| Age in Years (Range)                                            | 22 – 40 (Age at IFNa swab) | 23 - 42 (Age at first positive swab) |

**Mothers Demographics Table – Healthy control serum autoantibody analysis**

|                                               | Cases (n = 30)         |
|-----------------------------------------------|------------------------|
| Female                                        | 30                     |
| Male                                          | 0                      |
|                                               |                        |
| Hispanic                                      | 0                      |
| Not Hispanic                                  | 30                     |
|                                               |                        |
| White                                         | 28                     |
| Black/African American                        | 2                      |
|                                               |                        |
| Pre-Omicron (Variant Child Was Infected With) | 15                     |
| Omicron (Variant Child Was Infected With)     | 15                     |
|                                               |                        |
| Age in Years (Mean)                           | 30 (Age at blood)      |
| Age in Years (Median)                         | 30 (Age at blood)      |
| Age in Years (Range)                          | 22 – 39 (Age at blood) |

## CyTOF antibodies

| Metal label | Target     | Source      | Clone      | Catalog# | Lot #       |
|-------------|------------|-------------|------------|----------|-------------|
| 89Y         | CD66b      | BioLegend   | G10F5      | 305102   | B289360     |
| 102-110Pd   | barcodes   | Fluidigm    |            | 201060   |             |
| 113In       | CD57       | BioLegend   | HNK-1      | 359602   | B256178     |
| 140Ce       | Beads      | Fluidigm    |            | 201078   | 2108040-25  |
| 141Pr       | HLA-DR     | BioLegend   | L243       | 307651   | B293412     |
| 142Nd       | CD19       | Fluidigm    | HIB19      | 3142001B | 2110583-20  |
| 143Nd       | CD127      | Fluidigm    | A019D5     | 3143012B | 2109346-24  |
| 144Nd       | IL4        | Fluidigm    | MP4-25D2   | 3144010B | 1641910     |
| 145Nd       | CD4        | Fluidigm    | RPA-T4     | 3145001B | 2109320-22  |
| 146Nd       | IgD        | Fluidigm    | IA6-2      | 3146005B | 2112420-15  |
| 147Sm       | CD20       | Fluidigm    | 2H7        | 3147001B | 2108087-31  |
| 148Nd       | CD34       | Fluidigm    | 581        | 3148001B | 3361909     |
| 149Sm       | STAT6      | Fluidigm    | 18/P-Stat6 | 3149004A | 2631806     |
| 150Nd       | pSTAT5     | Fluidigm    | 47         | 3150005A | 2103186-01  |
| 151Eu       | CD123      | Fluidigm    | 6H6        | 3151001B | 2112140-01  |
| 152Sm       | CLEC9A     | BioLegend   | 8F9        | 353802   | B285751     |
| 153Eu       | pSTAT1     | Fluidigm    | 4a         | 3153005A | 0572002     |
| 154Sm       | H3K27ac    | ActiveMotif | MABI0309   | MABI0309 | 17014       |
| 155Gd       | CD27       | Fluidigm    | L128       | 3155001B | 3331901     |
| 156Gd       | CD45       | Fluidigm    | HI30       | 3156010B | 0652006     |
| 157Gd       | CD25       | BioLegend   | M-A251     | 356102   | B332599     |
| 158Gd       | pSTAT3     | HIMC        | 4/P-Stat3  | 3158005A | 0132015     |
| 159Tb       | CD11c      | Fluidigm    | Bu15       | 3159001B | 0622021     |
| 160Gd       | CD14       | Fluidigm    | M5E2       | 3160001B | 2102949-16  |
| 161Dy       | Ki-67      | Fluidigm    | B56        | 3161007B | 1262010     |
| 162Dy       | CD1c       | BioLegend   | L161       | 331502   | B341969     |
| 163Dy       | TCRg/d     | BioLegend   | B1         | 331202   | B336422     |
| 164Dy       | Arginase-1 | Fluidigm    | 658922     | 3164012B | 2191531     |
| 165Ho       | pCREB      | Fluidigm    | 87G3       | 3165009A | 1812007     |
| 166Er       | CD16       | BioLegend   | B73.1      | 360702   | B243320     |
| 167Er       | CD38       | Fluidigm    | HIT2       | 3167001B | 0902009     |
| 168Er       | CD8        | Fluidigm    | SK1        | 3168002B | 2103185-01  |
| 169Tm       | CD45RA     | Fluidigm    | HI100      | 3169008B | 2109314-21  |
| 170Er       | CD3        | Fluidigm    | UCHT1      | 3170001B | 1691904     |
| 171Yb       | Granzyme B | Fluidigm    | GB11       | 3171002B | 2111006-23  |
| 172Yb       | CD15       | Fluidigm    | W6D3       | 3172021B | 2103359-16  |
| 173Yb       | Perforin   | abcam       | B-D48      | ab47225  | GR3362878-9 |
| 174Yb       | IFNg       | BioLegend   | 4S.B3      | 502502   | B259482     |
| 175Lu       | pS6        | Fluidigm    | N7-548     | 3175009A | 3451912     |
| 176Yb       | CD56       | Fluidigm    | NCAM16.2   | 3176008B | 2151801     |
| 191Ir       | DNA1       | Fluidigm    |            | 201192A  | P19K2303    |
| 193Ir       | DNA2       | Fluidigm    |            | 201192A  | P19K2303    |
| 209Bi       | PD-L1      | Fluidigm    | MIH1       | 3209014B | 2102823-01  |



### Antibodies for T cell ICS assay

| Fluorochrome | Antigen | Vendor         | Catalog#   | Clone     | Reaction    | Volume per reaction (μl) |
|--------------|---------|----------------|------------|-----------|-------------|--------------------------|
| FITC         | IL-2    | Biolegend      | 500304     | MQ1-17H12 | ICS         | 2                        |
| PerCP-eF710  | CXCR5   | Invitrogen     | 46-9185-42 | MU5UBEE   | Stimulation | 2.5                      |
| PE           | IL-4    | BioLegend      | 500810     | MP4-25D2  | ICS         | 1                        |
| PE-CF594     | CD45RA  | BD Biosciences | 565419     | 5H9       | Surface     | 2                        |
| PE-Cy7       | TNF- α  | E-Bioscience   | 25-7349-82 | Mab11     | ICS         | 0.3                      |
| BV421        | CD40L   | Biolegend      | 310824     | 24-31     | ICS         | 2                        |
| BV506        | TCR-γδ  | Biolegend      | 331220     | B1.1      | Surface     | 2.5                      |
| BV605        | CD4     | Biolegend      | 317438     | OKT4      | Surface     | 1.5                      |
| BV650        | CD3     | BD Biosciences | 563916     | SP34-2    | Surface     | 2.5                      |
| BV711        | CCR7    | Biolegend      | 353228     | G043H7    | Surface     | 2                        |
| BV785        | CD127   | Biolegend      | 351330     | A019D5    | Surface     | 2.5                      |
| APC          | IL-21   | BioLegend      | 513008     | 3A3-N2    | ICS         | 2.5                      |
| A700         | IFN-γ   | Biolegend      | 502520     | 4S.B3     | ICS         | 1                        |
| APC-Cy7      | CD25    | Biolegend      | 302614     | BC96      | Surface     | 2                        |
| BUV395       | CXCR3   | BD Biosciences | 565223     | 1C6/CXCR3 | Stimulation | 2.5                      |
| BUV563       | CD8     | BD Biosciences | 612914     | RPA-T8    | Surface     | 2                        |
| BUV737       | CCR6    | BD Biosciences | 612780     | 11A9      | Surface     | 2                        |
| BUV805       | CD69    | BD Biosciences | 748763     | FN50      | Surface     | 2                        |

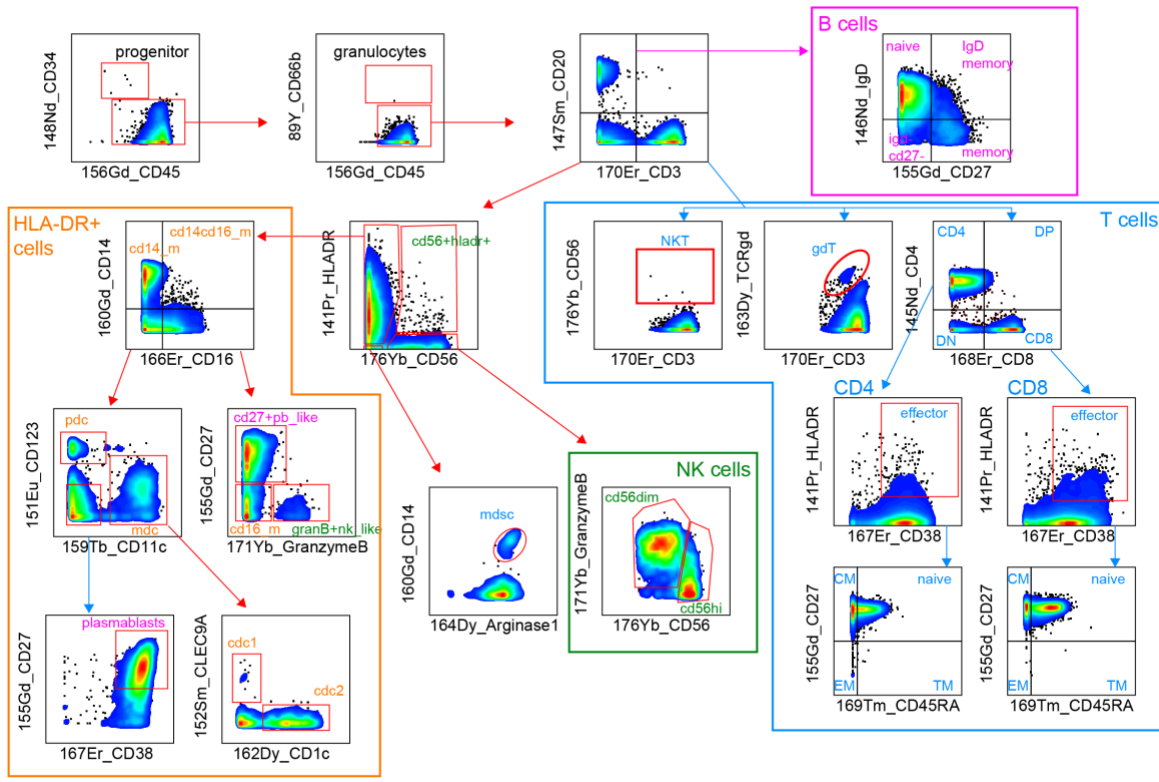

CytoF Gating Scheme
