# Supplementary material
Source: PubMed Central journal article supplement (PMC10724861)

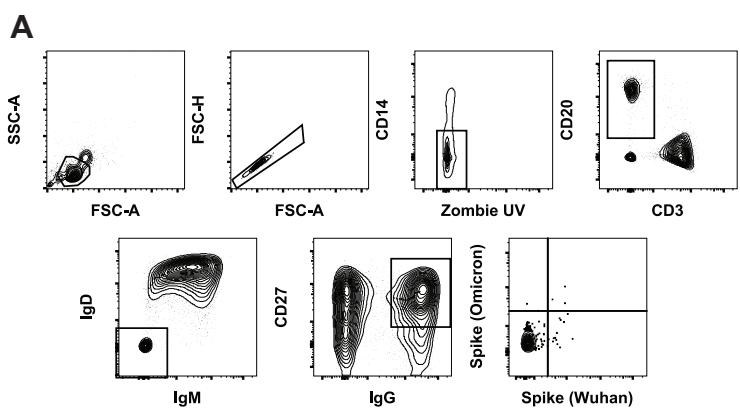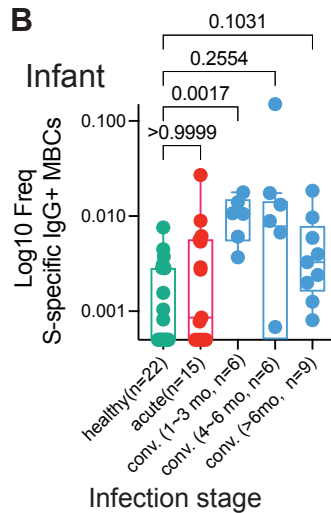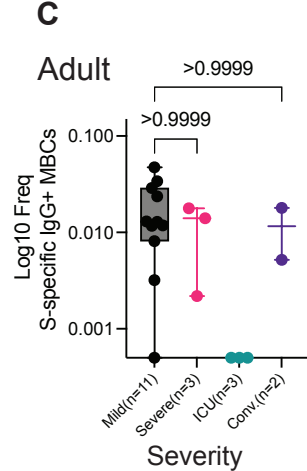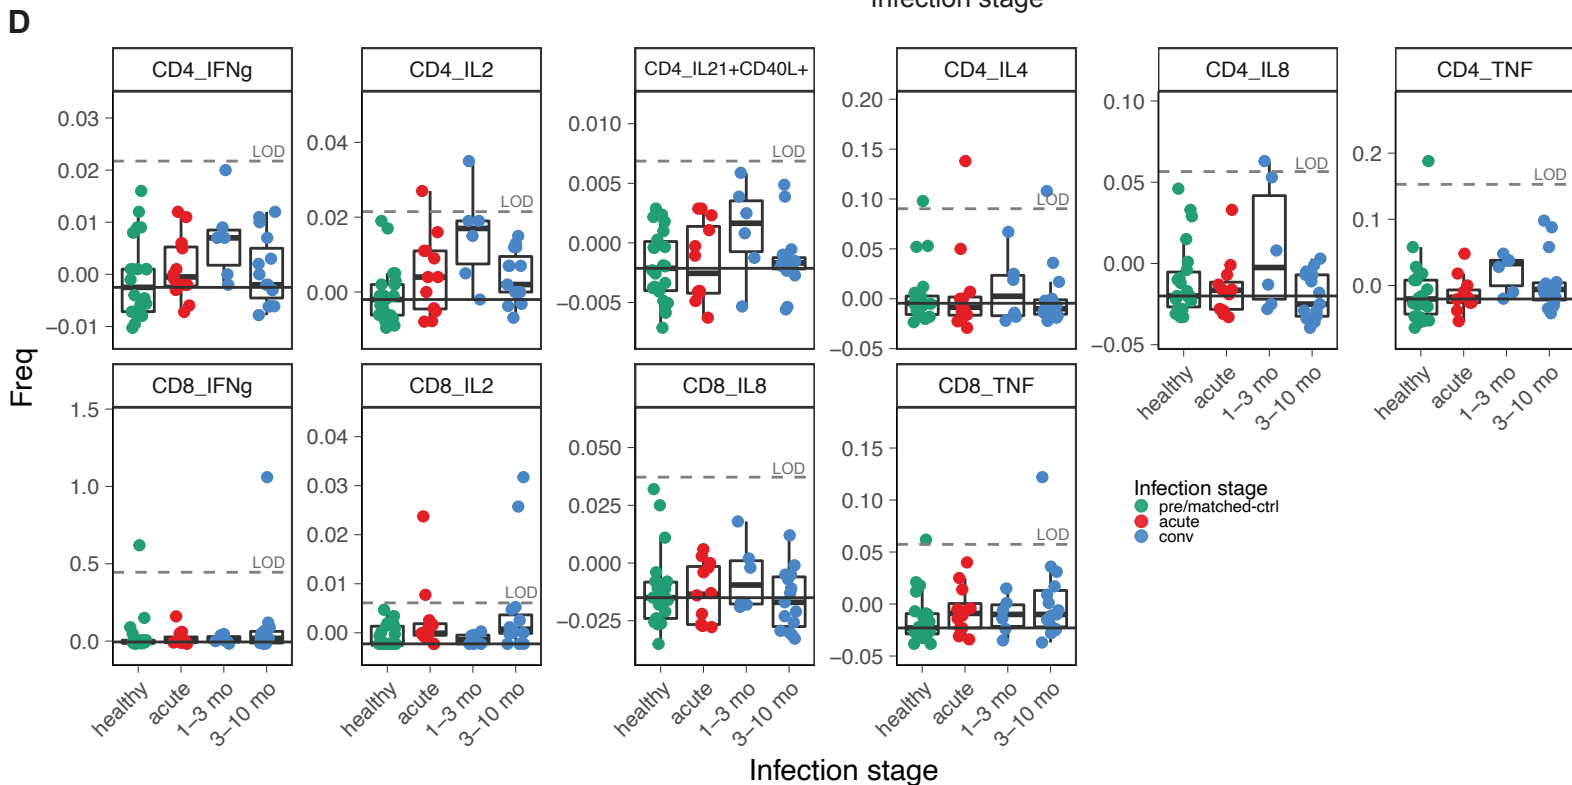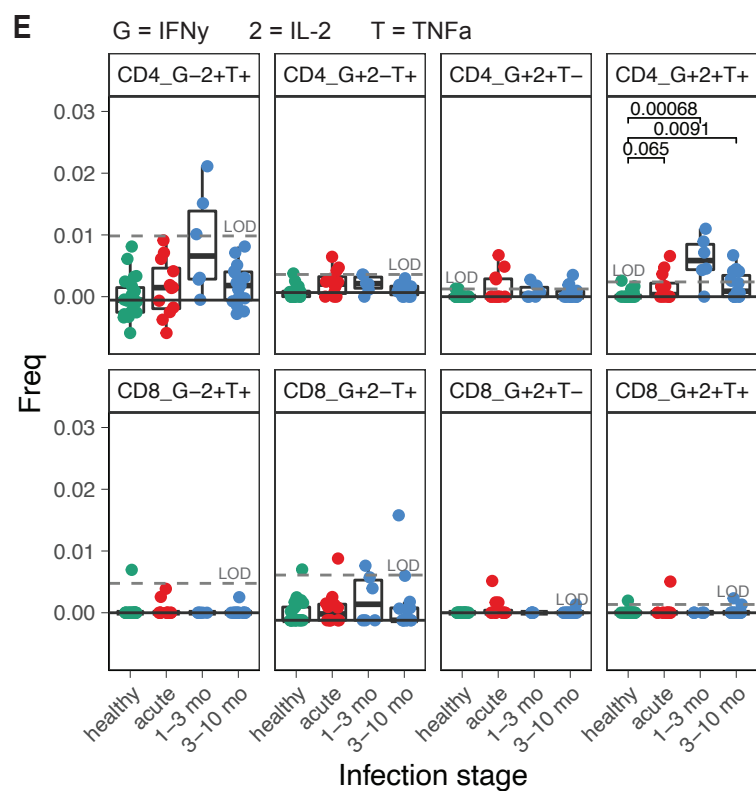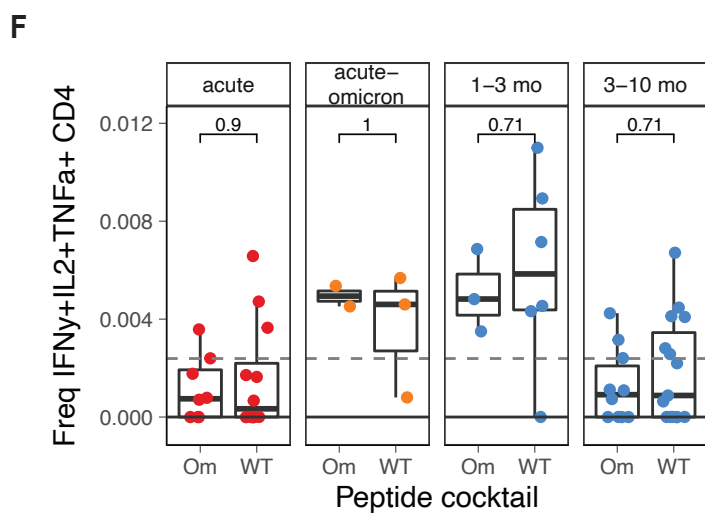

Supplement: NIHMS1946837-supplement-FigureS2.pdf [file NIHMS1946837-supplement-FigureS2.pdf]

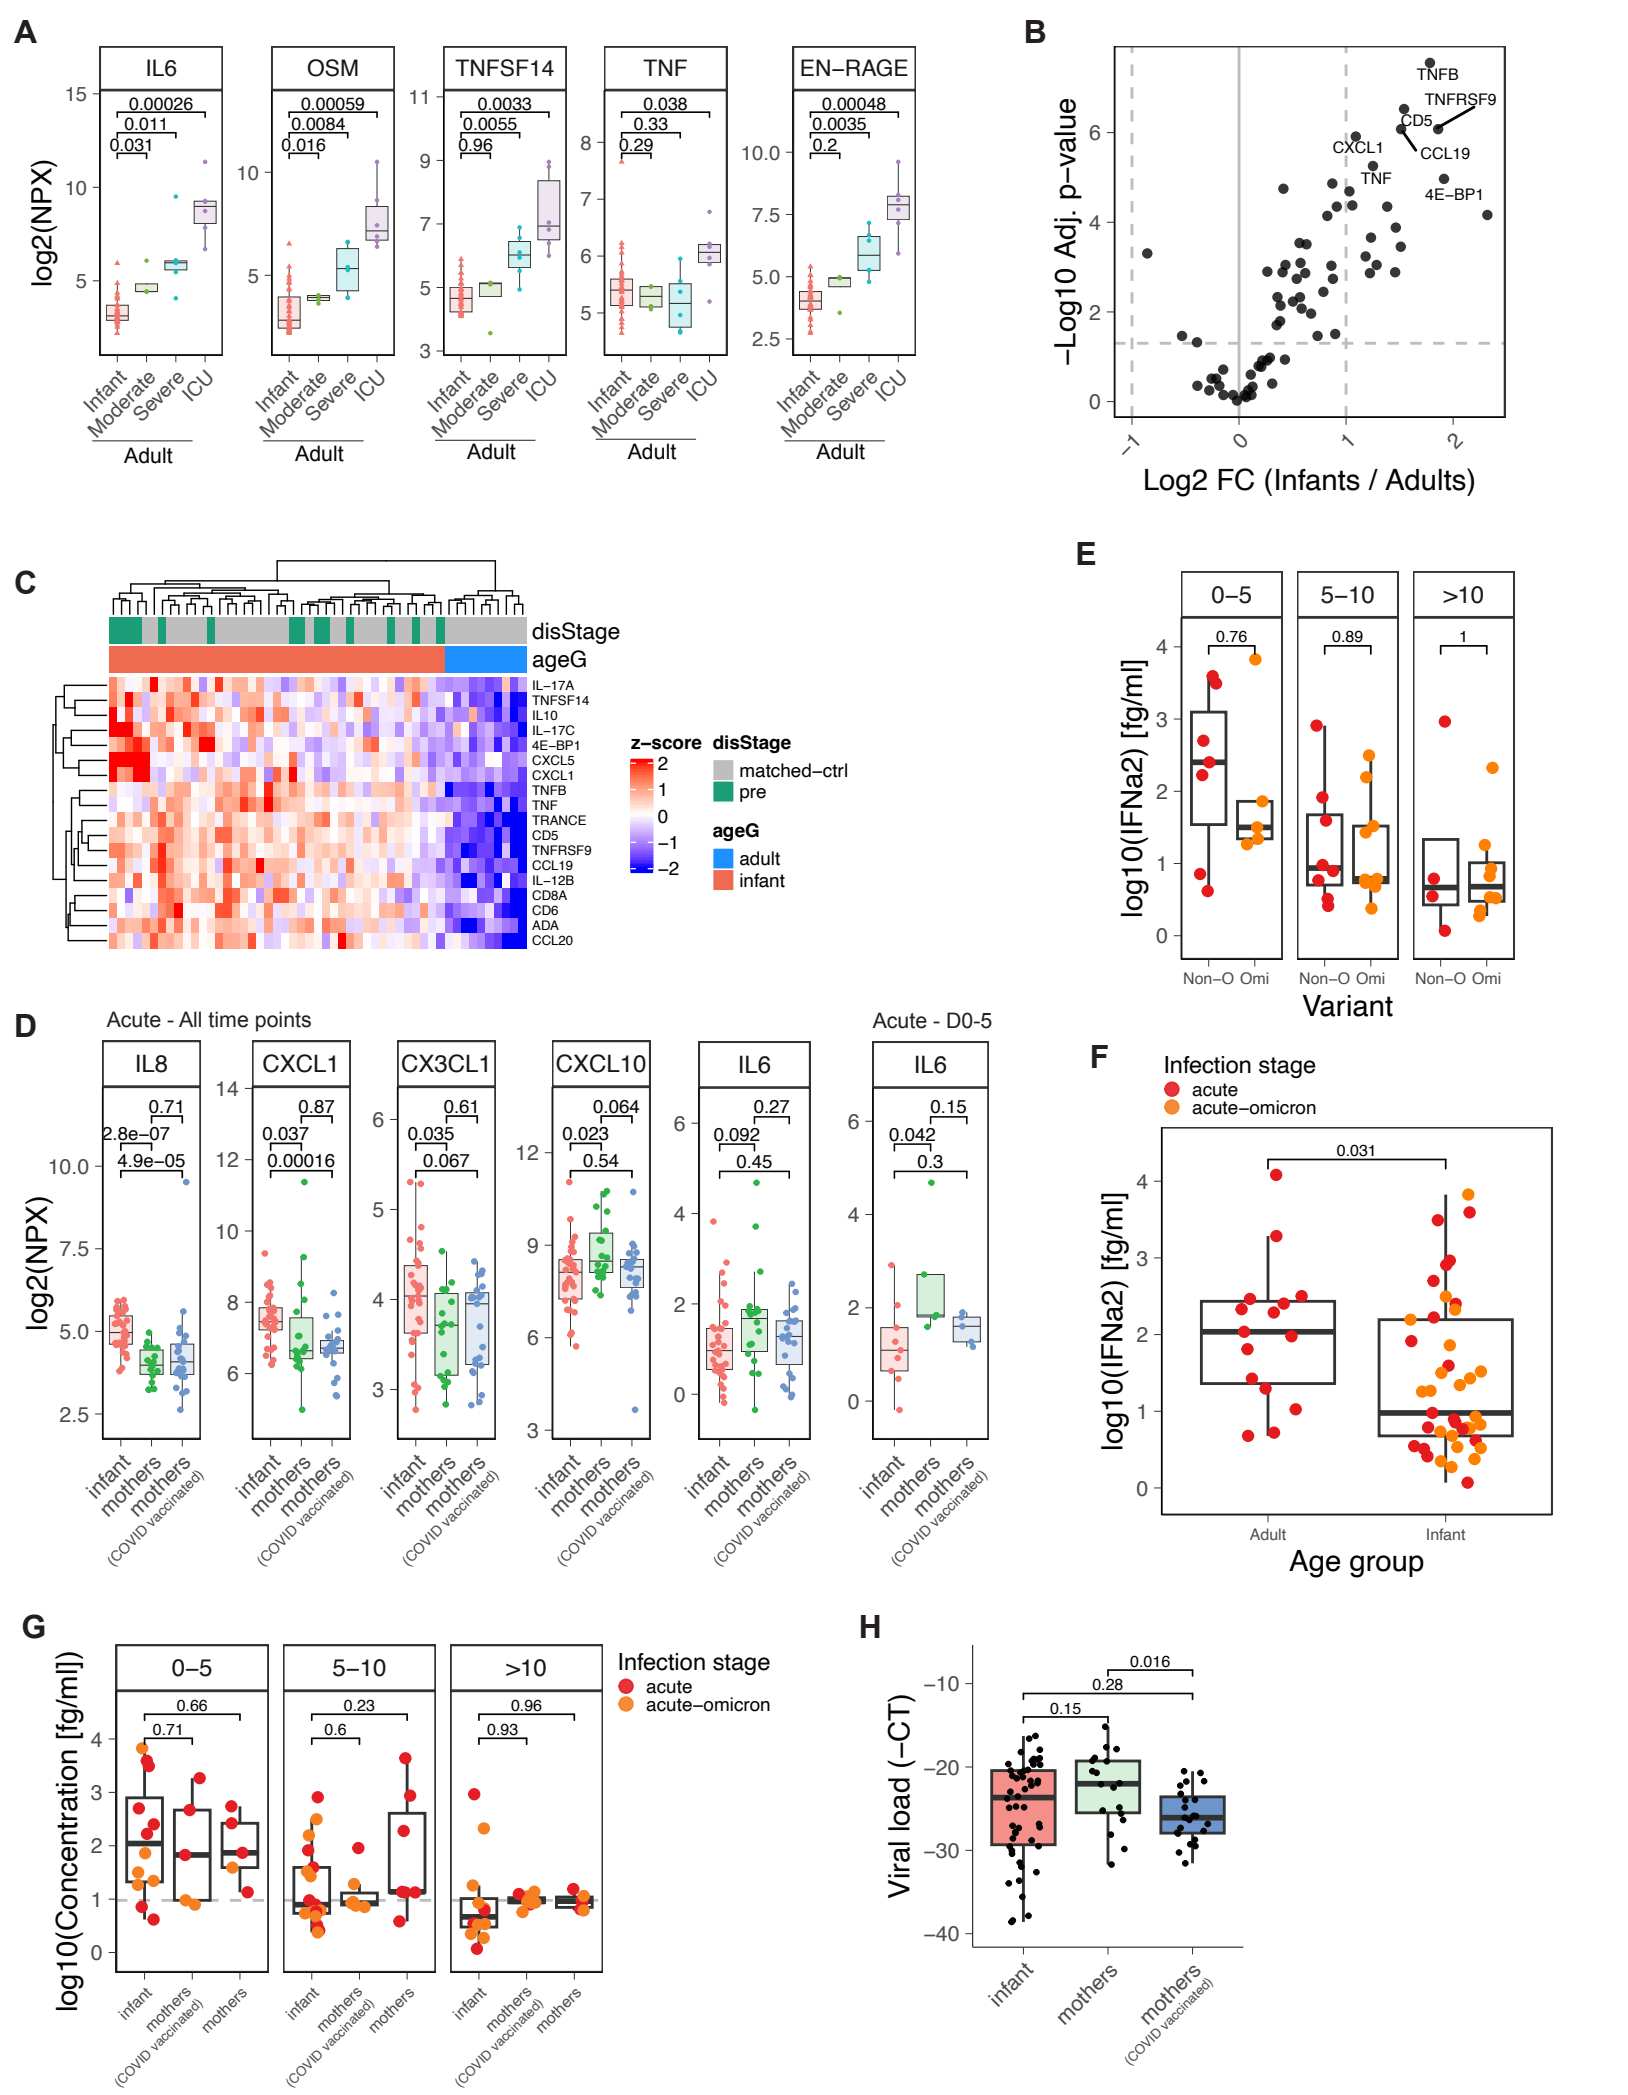

Supplement: NIHMS1946837-supplement-FigureS3.pdf [file NIHMS1946837-supplement-FigureS3.pdf]

**A**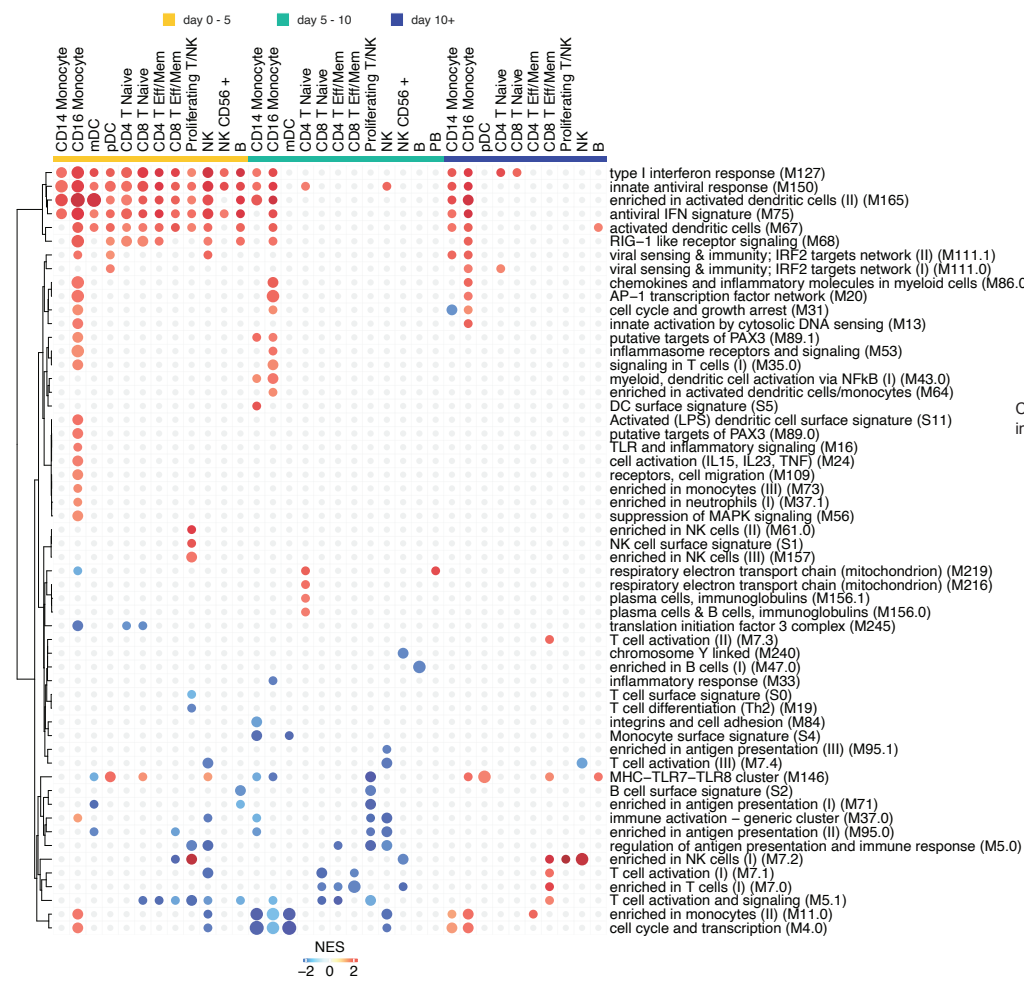**B**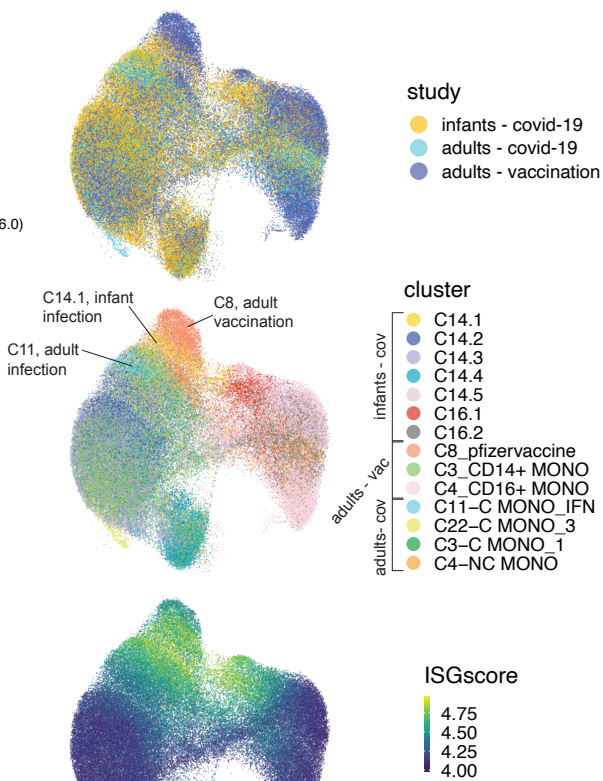**C**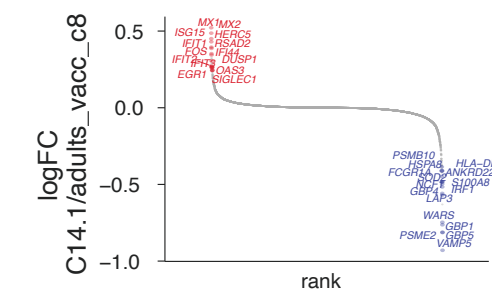**D**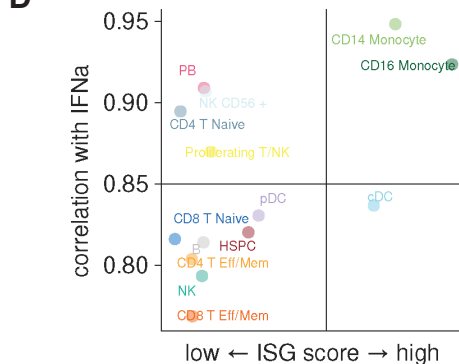**I**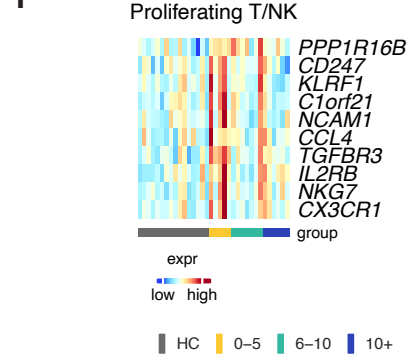**E**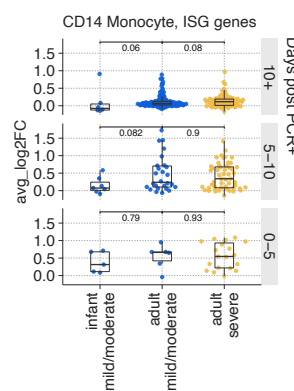**F**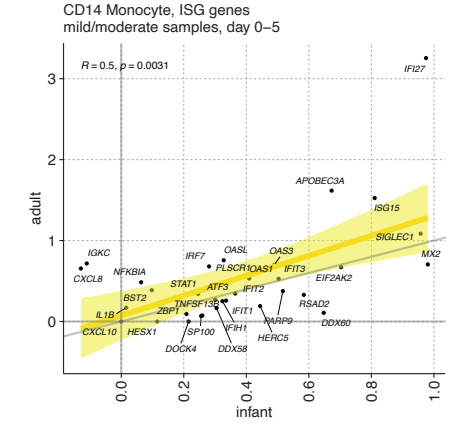**G**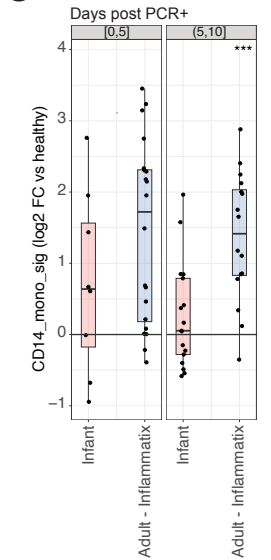**H**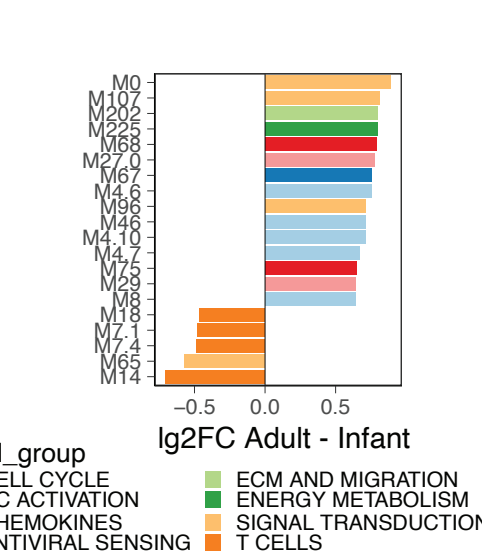

Supplement: NIHMS1946837-supplement-FigureS5.pdf [file NIHMS1946837-supplement-FigureS5.pdf]

**A**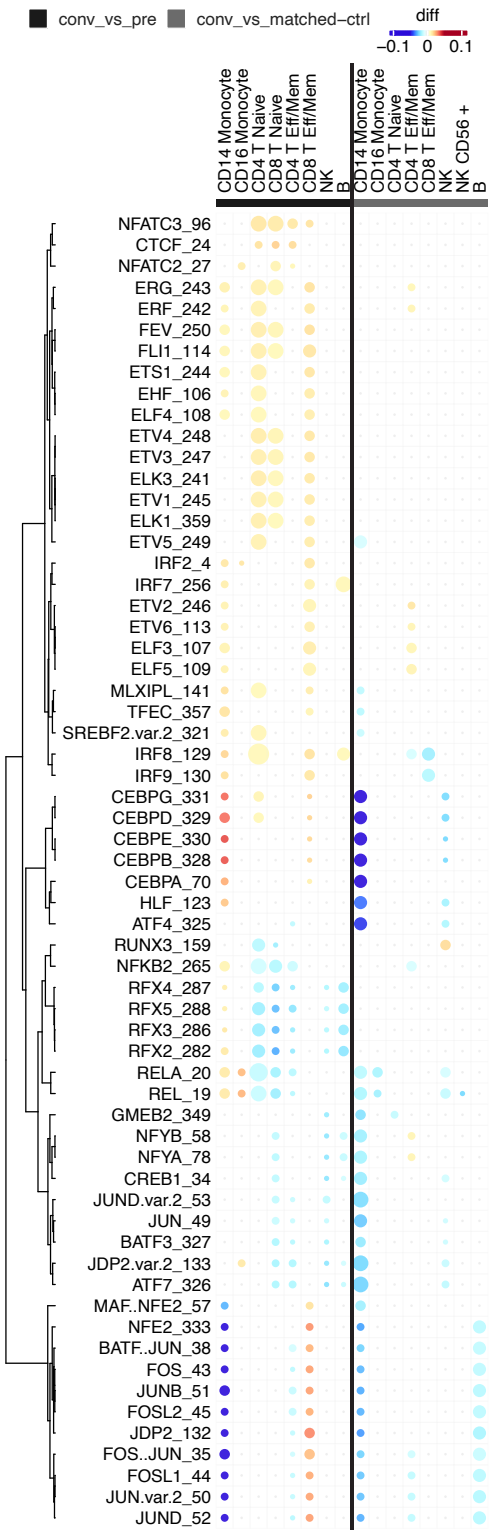**B**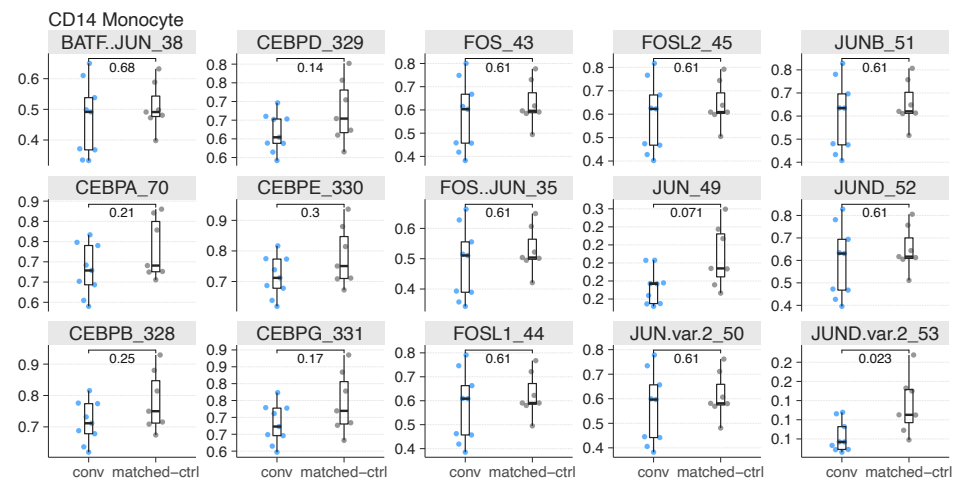**C**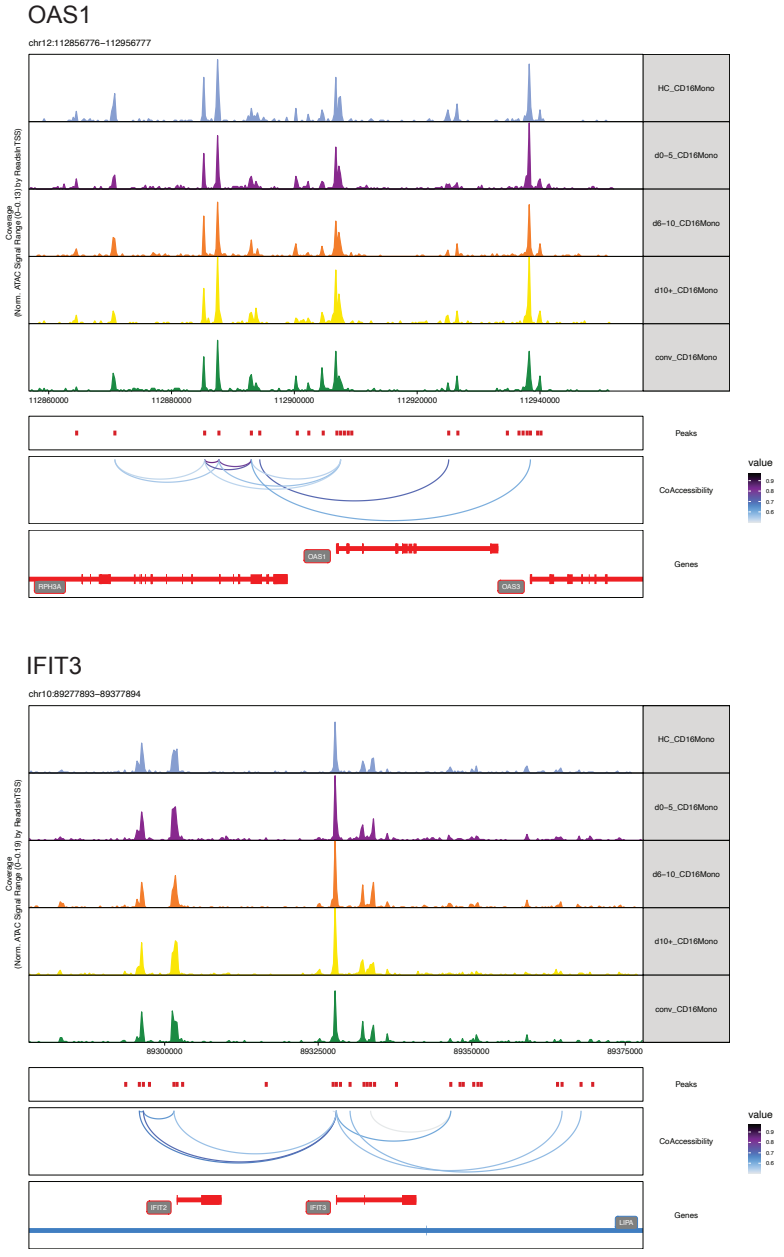

Supplement: NIHMS1946837-supplement-FigureS6.pdf [file NIHMS1946837-supplement-FigureS6.pdf]

**A** Infant nose swab samples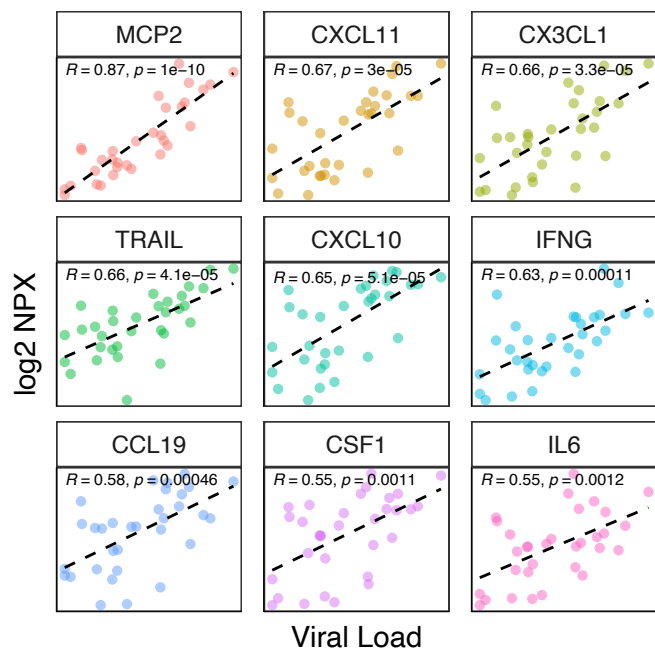**B**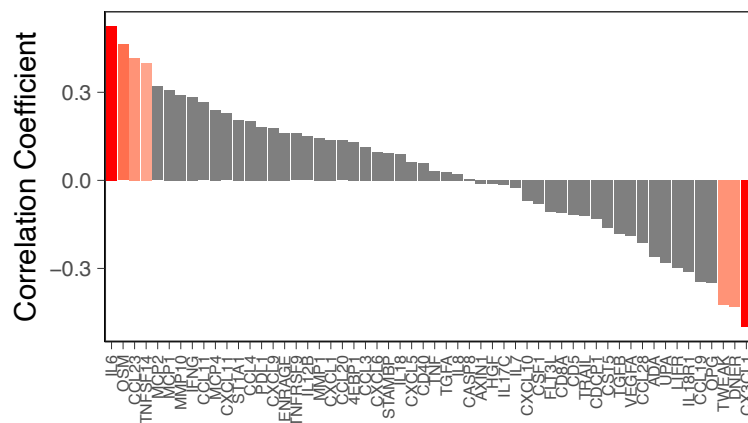**C**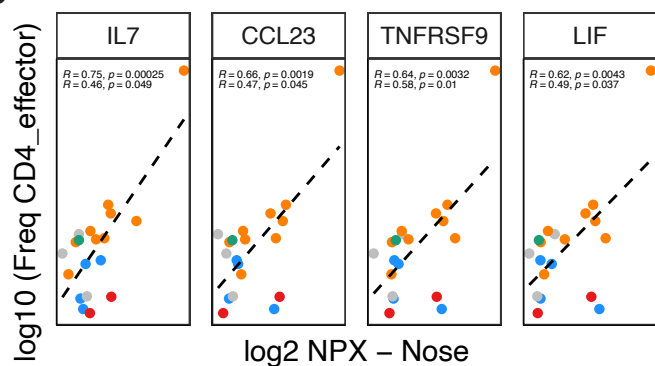**D**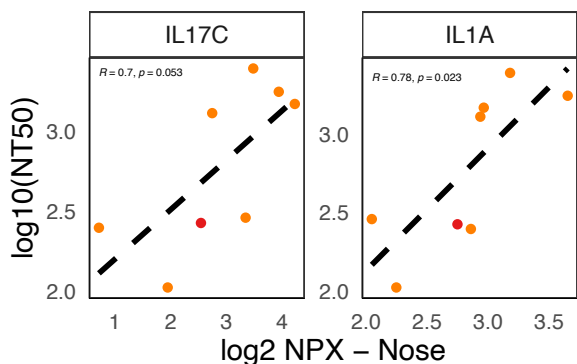**H**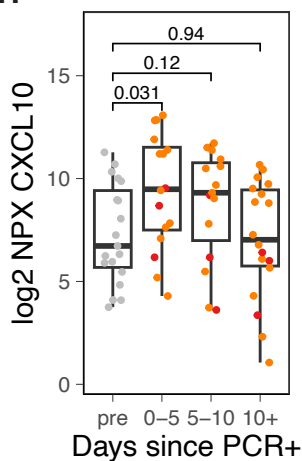**I**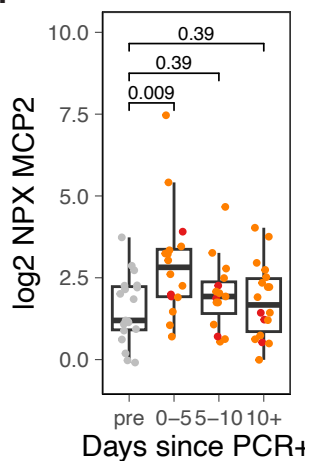**J**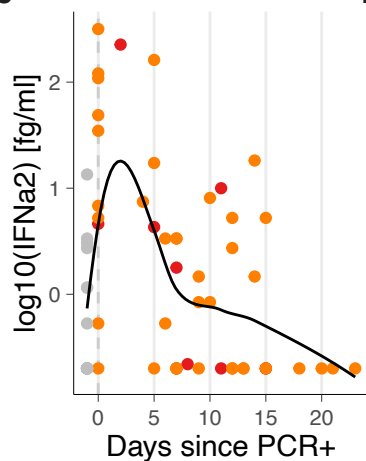**K**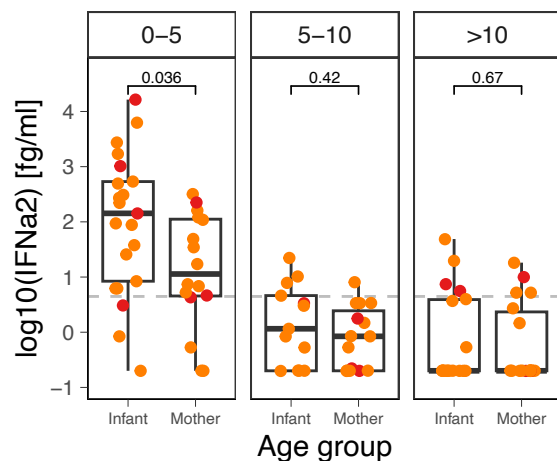**E**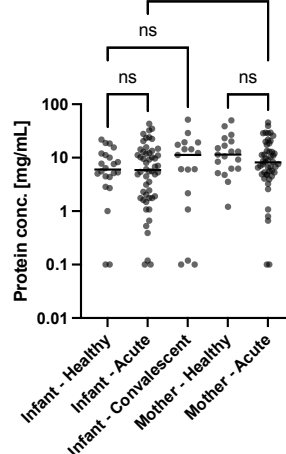**F**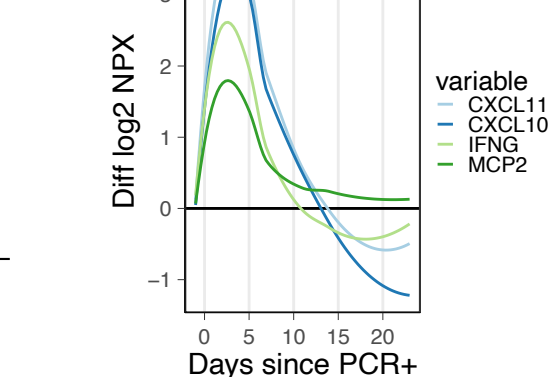**F**

## Maternal nose swab samples

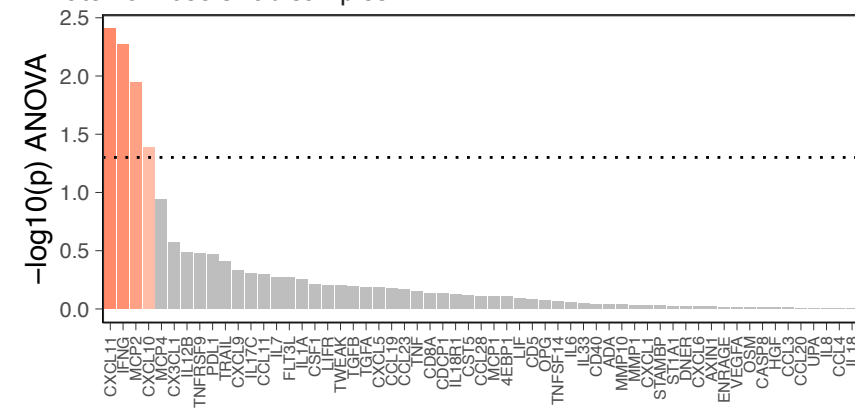

Supplement: NIHMS1946837-supplement-FigureS7.pdf [file NIHMS1946837-supplement-FigureS7.pdf]
